# Supplementary material for: Patterns of Tadpole β Diversity in Temperate Montane Streams
Source: MDPI journal article supplement (doi:10.3390/ani14081240), 2024-04-20
Supplement: s1 [file s1]

**Table S1.** Geographical information on the 18 selected transects in Mount Emei.

| <b>Name</b>      | <b>Code</b> | <b>Longitude (E)</b> | <b>Latitude (N)</b> | <b>Elevation (m)</b> |
|------------------|-------------|----------------------|---------------------|----------------------|
| Huangwanfangqu   | YX1         | 103.4367             | 29.5824             | 485                  |
| Huangwan         | YX2         | 103.4377             | 29.5874             | 509                  |
| Baoguosi         | YX3         | 103.4408             | 29.5689             | 563                  |
| Shenshuigedahe   | YX4         | 103.4039             | 29.5607             | 638                  |
| Lianghekou       | YX5         | 103.4106             | 29.5866             | 658                  |
| Qingyinge        | YX6         | 103.3944             | 29.5717             | 708                  |
| Shenshuige       | YX7         | 103.4088             | 29.5659             | 807                  |
| Chadicunxiagou   | YX8         | 103.3598             | 29.5965             | 928                  |
| Heishuicun       | YX9         | 103.3610             | 29.6021             | 950                  |
| Chadicunshanggou | YX10        | 103.3181             | 29.5983             | 1113                 |
| Longdonghe       | YX11        | 103.2827             | 29.5820             | 1242                 |
| Longdonghezhiliu | YX12        | 103.2816             | 29.5785             | 1248                 |
| Linggonglizhugou | YX13        | 103.2916             | 29.5855             | 1320                 |
| Linggonglizhigou | YX14        | 103.2908             | 29.5864             | 1323                 |
| Changshouqiao    | YX15        | 103.3505             | 29.5594             | 1560                 |
| Longqiaogou      | YX16        | 103.3523             | 29.5522             | 1602                 |
| Shuangshuijin    | YX17        | 103.3209             | 29.5471             | 2243                 |
| Jinding          | YX18        | 103.3332             | 29.5237             | 2865                 |

**Table S2.** The averages and standard deviation values of microhabitat variables.

| Microhabitat variables      | Average | Standard deviation |
|-----------------------------|---------|--------------------|
| water temperature (°C)      | 15.20   | ± 2.77             |
| water pH                    | 7.99    | ± 0.32             |
| water conductivity (µs/cm)  | 263.83  | ± 141.86           |
| dissolved oxygen (µmol/L)   | 8.24    | ± 0.54             |
| current velocity (m/s)      | 0.26    | ± 0.15             |
| water depth (cm)            | 27.89   | ± 8.81             |
| river width (m)             | 4.20    | ± 2.57             |
| total phosphorus (mg/L)     | 0.02    | ± 0.01             |
| total nitrogen (mg/L)       | 3.00    | ± 0.99             |
| ammonium nitrogen (mg/L)    | 0.17    | ± 0.06             |
| chlorophyll <i>a</i> (mg/L) | 0.34    | ± 0.53             |



| Scientific name                  | YX1   | YX2 | YX3   | YX4   | YX5 | YX6   | YX7  | YX8  | YX9 | YX10 | YX11  | YX12  | YX13 | YX14 | YX15 | YX16 | YX17 | YX18 |
|----------------------------------|-------|-----|-------|-------|-----|-------|------|------|-----|------|-------|-------|------|------|------|------|------|------|
| <i>Odorrana margaretae</i>       | 0     | 0   | 31.58 | 24.00 | 0   | 11.30 | 0    | 6.54 | 0   | 0.28 | 0     | 0     | 0    | 0    | 0    | 0    | 0    | 0    |
| <i>Pelophylax nigromaculatus</i> | 46.77 | 0   | 0     | 4.00  | 0   | 0     | 0    | 0    | 0   | 0    | 0     | 0     | 0    | 0    | 0    | 0    | 0    | 0    |
| <i>Rana omeimontis</i>           | 0     | 0   | 0     | 0     | 0   | 0     | 0    | 0    | 0   | 0    | 29.49 | 37.34 | 0    | 0    | 0    | 0    | 0    | 0    |
| <i>Rhacophorus omeimontis</i>    | 0     | 0   | 0     | 0     | 0   | 0     | 3.57 | 7.19 | 0   | 0    | 0     | 9.43  | 0    | 0    | 0    | 0    | 0    | 0    |

**Table S4.** Relationships between distance of predictor variables (i.e., geographical, elevational and environmental distance) and multifaceted  $\beta$  diversity based on liner regression models.

| $\beta$ diversity components | Predictors             | Intercept | Slope      | r      | <i>p</i>     |
|------------------------------|------------------------|-----------|------------|--------|--------------|
| Total dissimilarity          |                        | 0.527     | 0.017      | 0.279  | <b>0.007</b> |
| Turnover                     | Geographical distance  | 0.357     | 0.022      | 0.267  | <b>0.008</b> |
| Nestedness                   |                        | 0.170     | -0.005315  | -0.153 | 0.952        |
| Total dissimilarity          |                        | 5.442e-01 | 2.342e-04  | 0.273  | <b>0.010</b> |
| Turnover                     | Elevational distance   | 0.367     | 0.0003     | 0.291  | <b>0.008</b> |
| Nestedness                   |                        | 1.774e-01 | -9.990e-05 | -0.176 | 0.962        |
| Total dissimilarity          |                        | 0.222     | 0.091      | 0.465  | <b>0.006</b> |
| Turnover                     | Environmental distance | -0.039    | 0.118      | 0.440  | <b>0.007</b> |
| Nestedness                   |                        | 0.262     | -0.027     | -0.244 | 0.959        |

The bold values indicate  $p < 0.05$ .

**Table S5.** Independent contribution of each explanatory distance matrix in the variations of multifaceted  $\beta$  diversity. The meaning of the abbreviations can be found in Table 2.

|       | Total dissimilarity | Turnover | Nestedness |
|-------|---------------------|----------|------------|
| Geo   | 14.77%              | 12.62%   | 4.58%      |
| Ele   | 5.75%               | 9.07%    | 13.73%     |
| pH    | 0.12%               | 0.25%    | 0.51%      |
| Con   | 1.22%               | 4.33%    | 14.22%     |
| Do    | 0.38%               | 0.79%    | 1.70%      |
| Rw    | 27.26%              | 21.60%   | 5.64%      |
| Wd    | 0.28%               | 0.94%    | 16.41%     |
| Cv    | 10.03%              | 15.47%   | 22.66%     |
| chl.a | 33.62%              | 27.68%   | 8.62%      |
| TN    | 2.90%               | 5.25%    | 9.52%      |
| NN    | 0.59%               | 0.56%    | 0.30%      |
| TP    | 3.06%               | 1.33%    | 0.17%      |
| Sub   | 0.03%               | 0.12%    | 1.94%      |
